# Supplementary material for: Genomic Diversity and Runs of Homozygosity in Bernese Mountain Dogs
Source: MDPI journal article supplement (doi:10.3390/genes14030650), 2023-03-04

**Supplementary Figure S1. Proportion of dogs with a SNP within a ROH on each of the 38 autosomes.**

**chromosome 1**

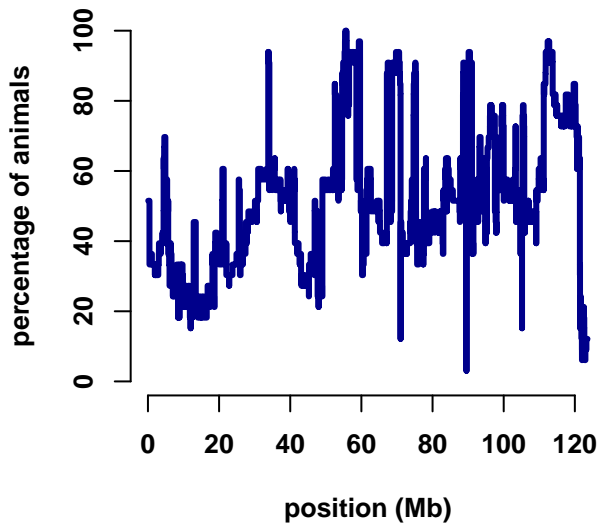

**chromosome 2**

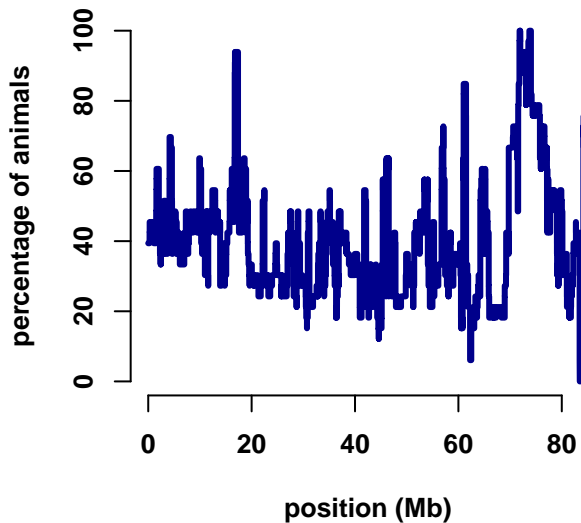

**chromosome 3**

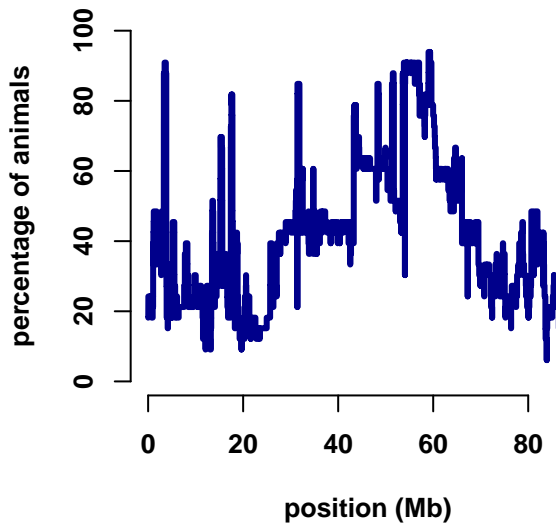

**chromosome 4**

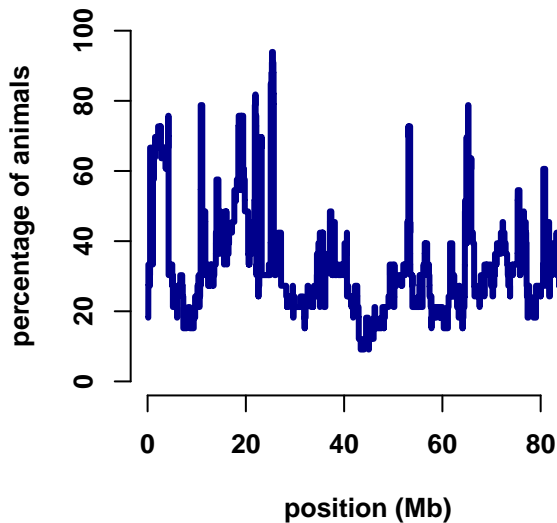

**chromosome 5**

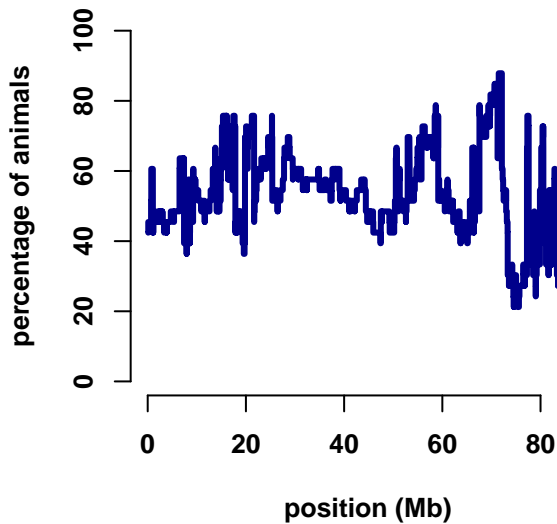

**chromosome 6**

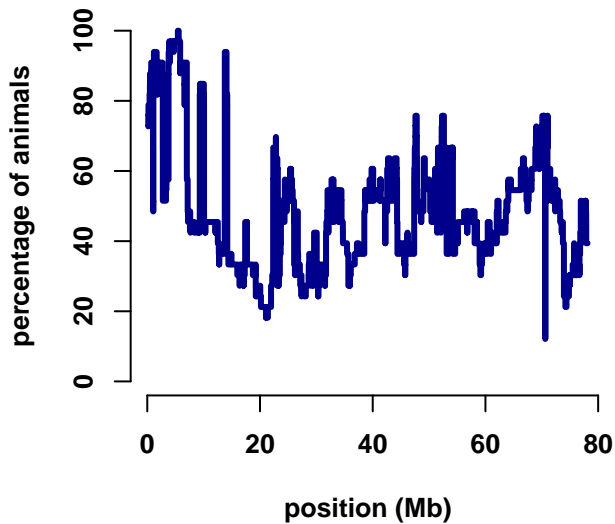

**chromosome 7**

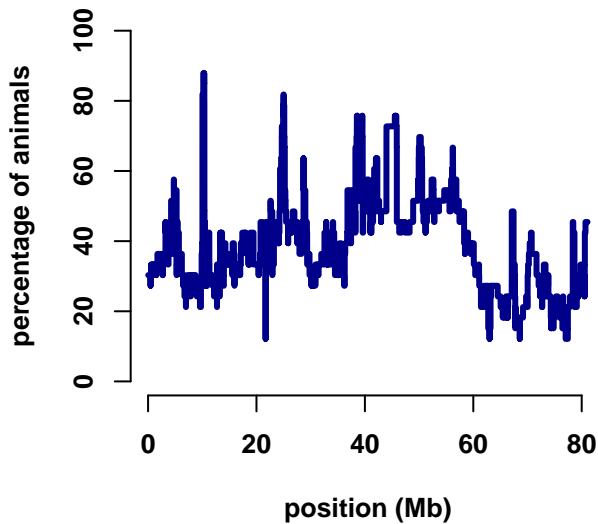

**chromosome 8**

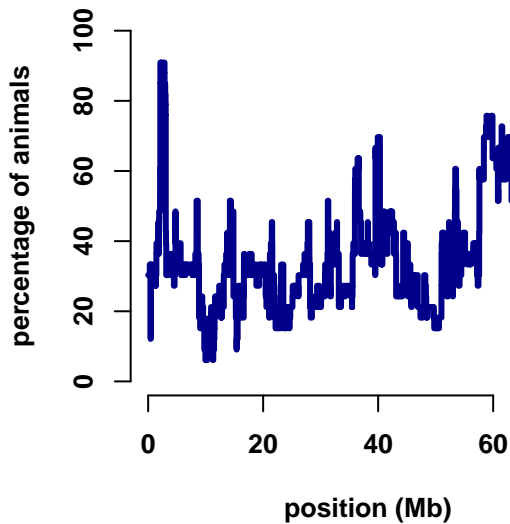

**chromosome 9**

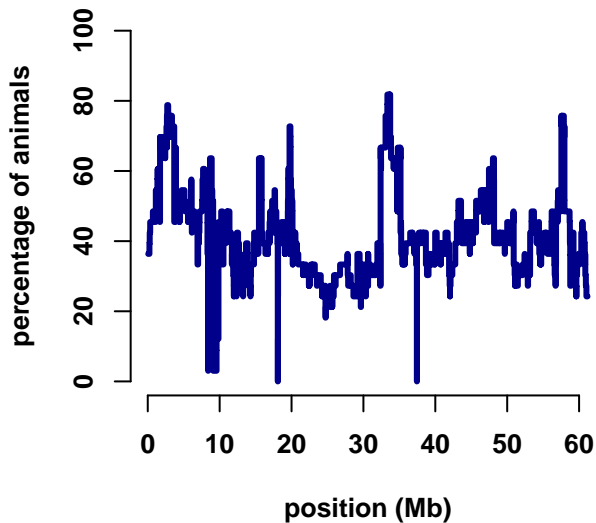

**chromosome 10**

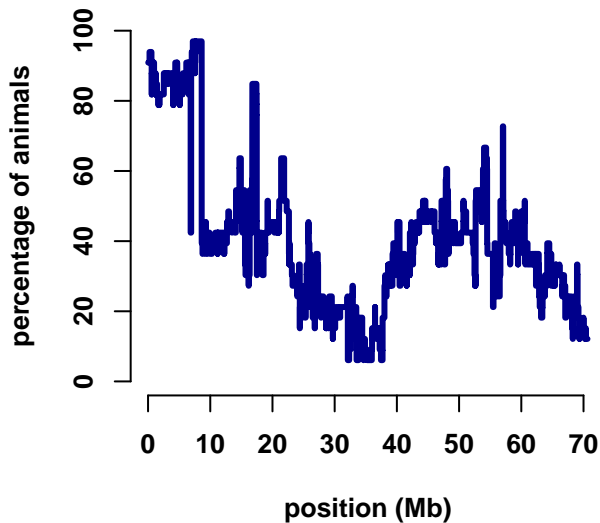

**chromosome 11**

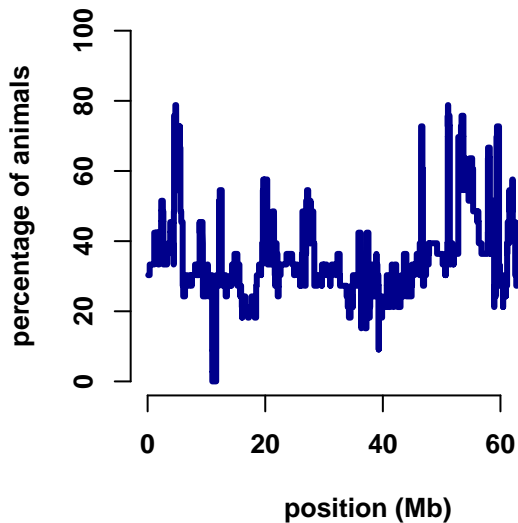

**chromosome 12**

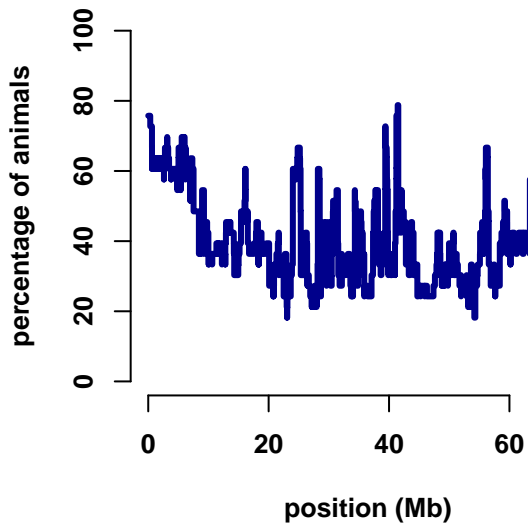

**chromosome 13**

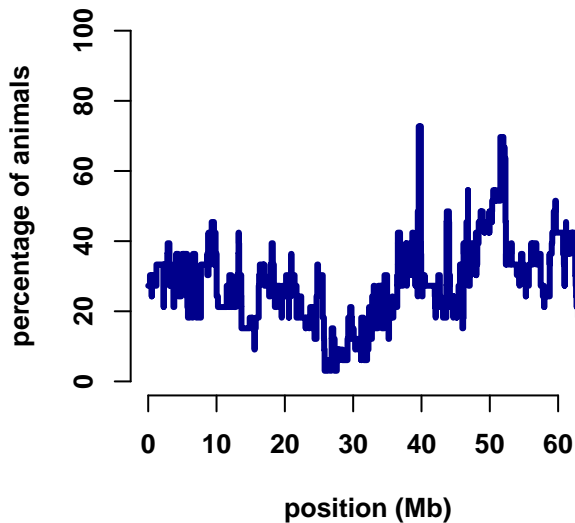

**chromosome 14**

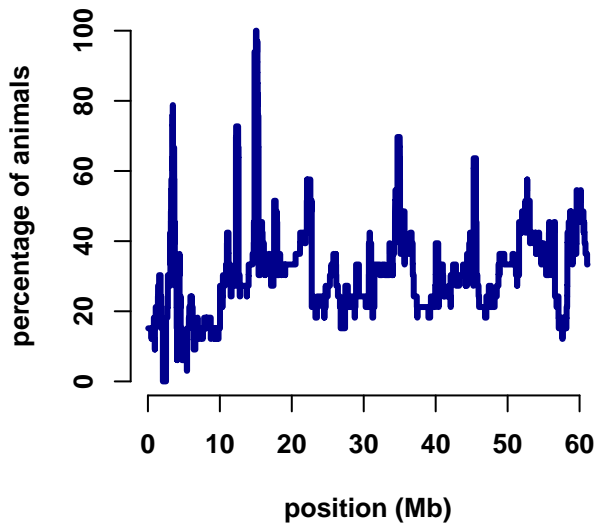

**chromosome 15**

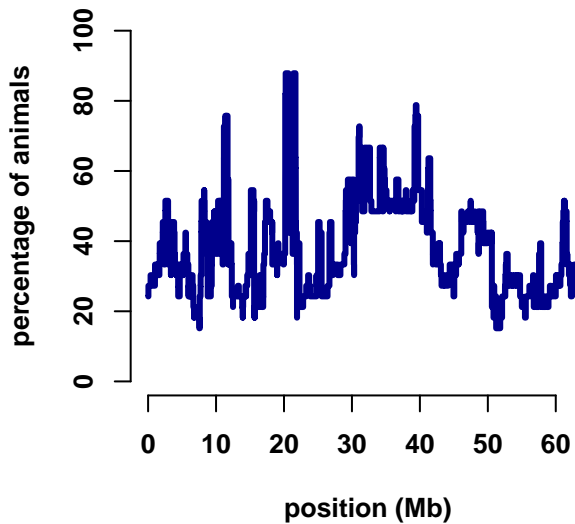

**chromosome 16**

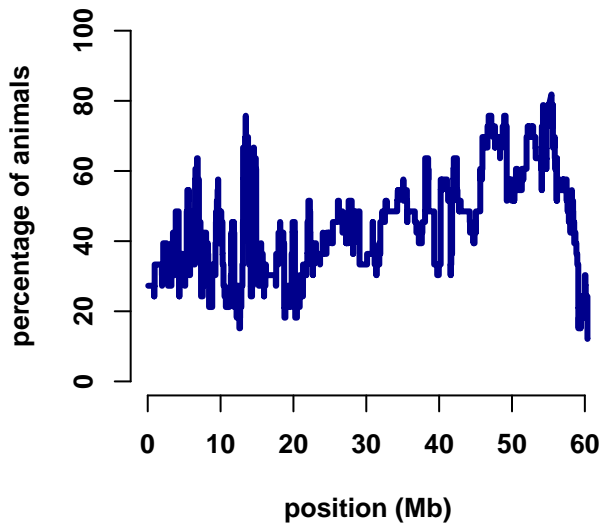

chromosome 17

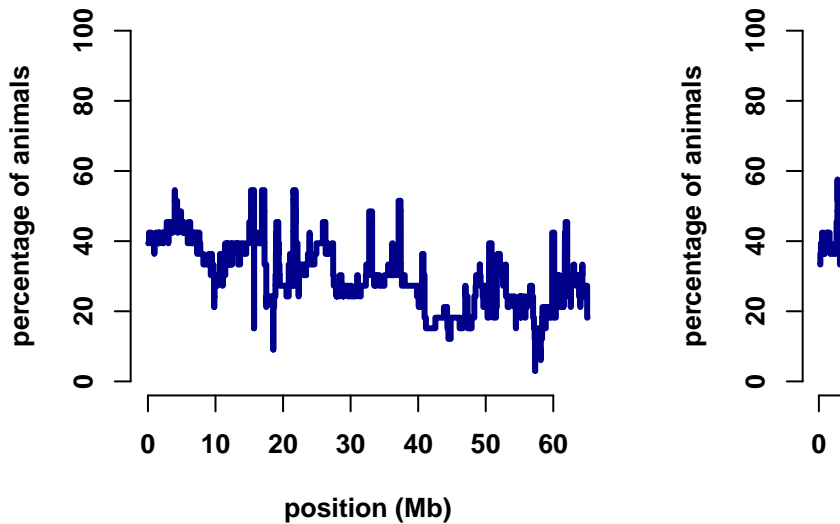

chromosome 18

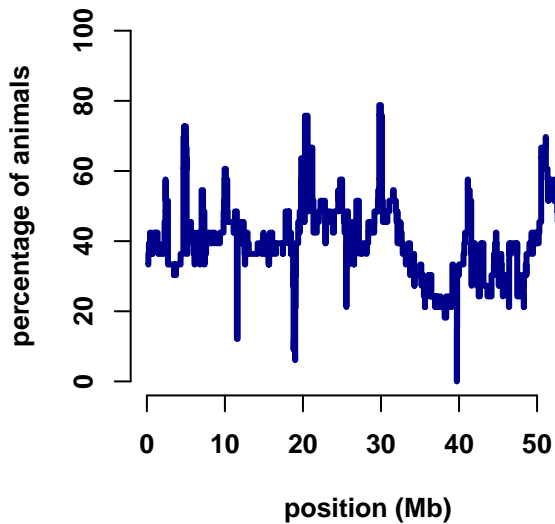

chromosome 19

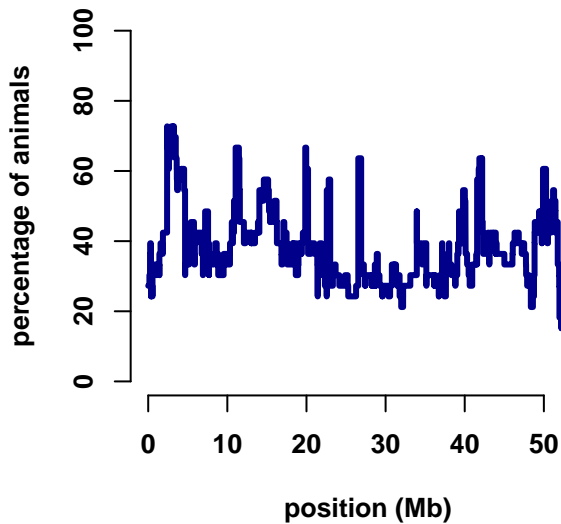

chromosome 20

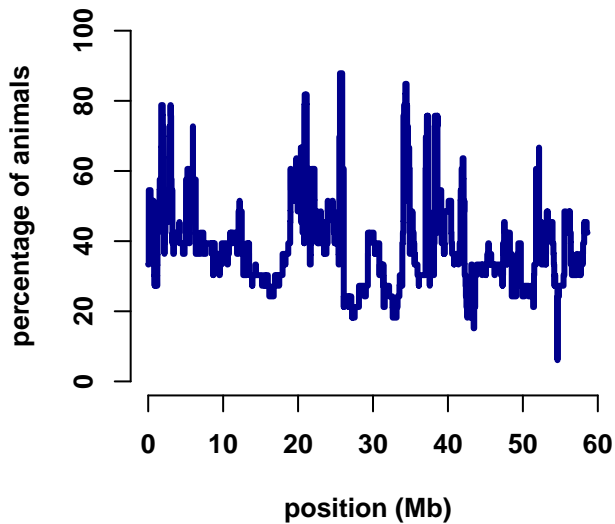

**chromosome 21**

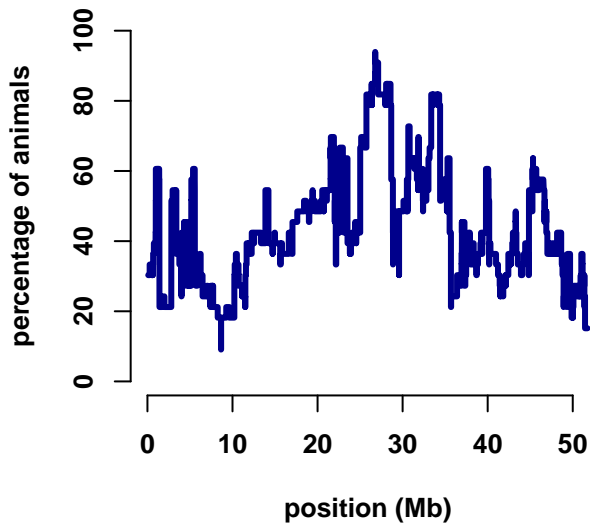

**chromosome 22**

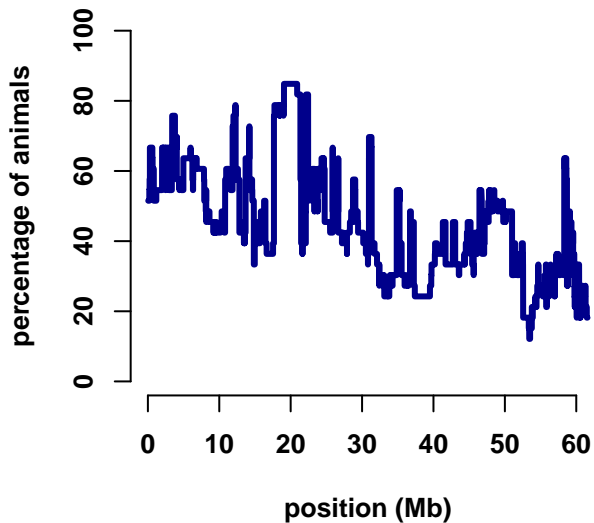

**chromosome 23**

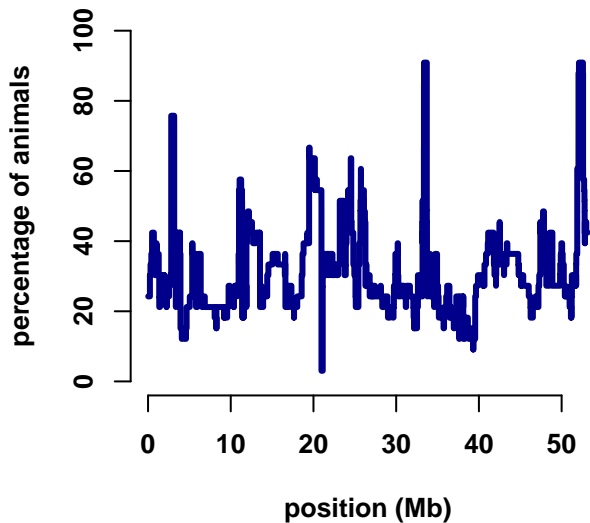

**chromosome 24**

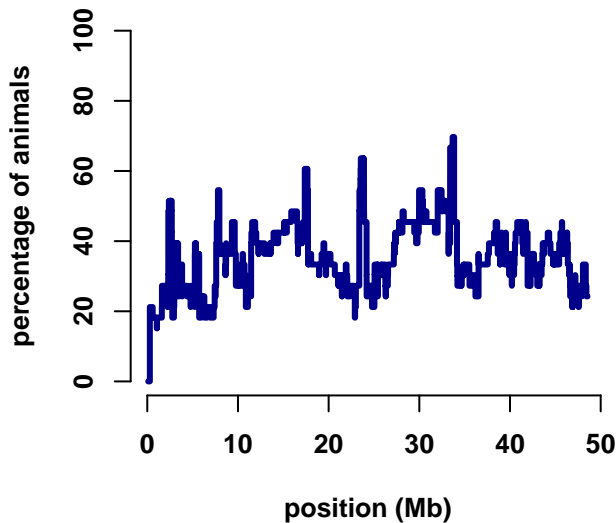

**chromosome 25**

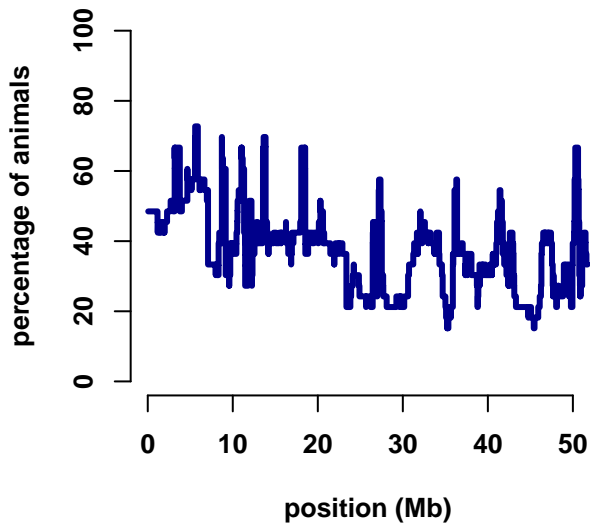

**chromosome 26**

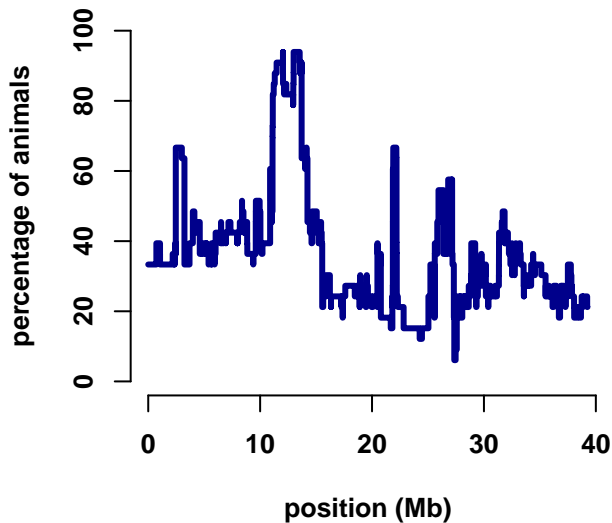

**chromosome 27**

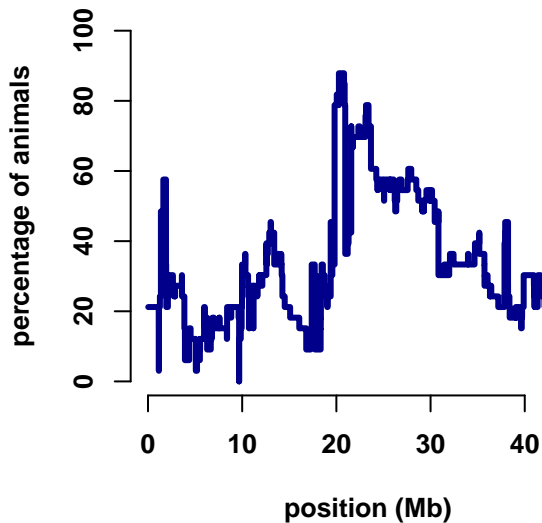

**chromosome 28**

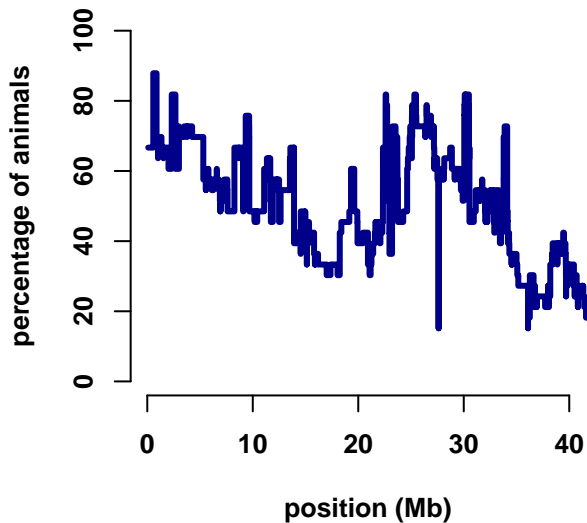

**chromosome 29**

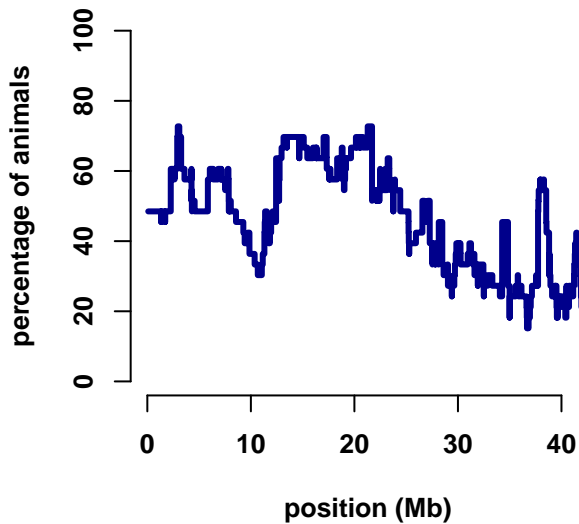

**chromosome 30**

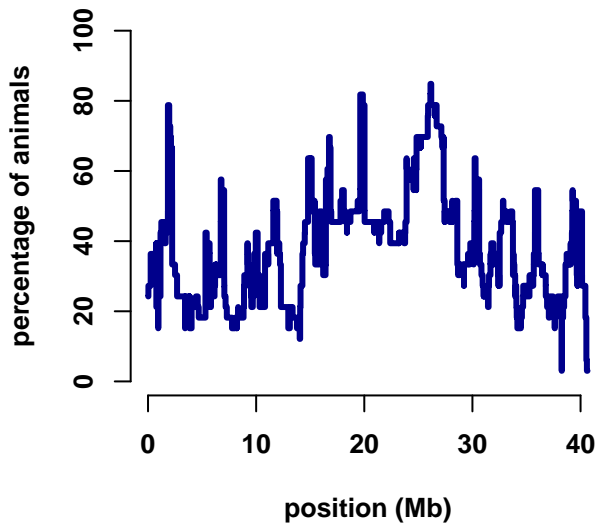

**chromosome 31**

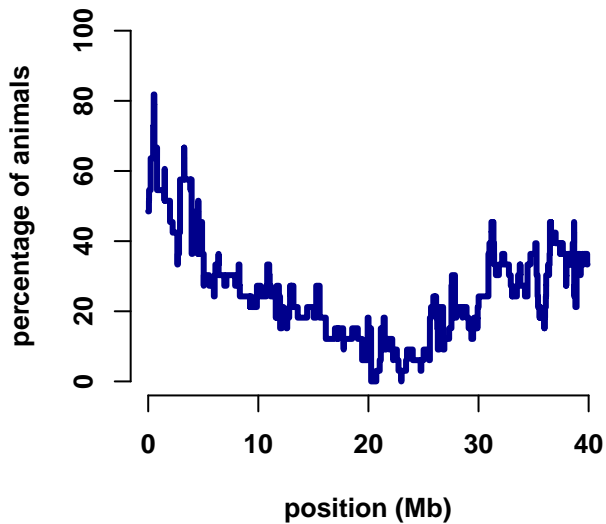

**chromosome 32**

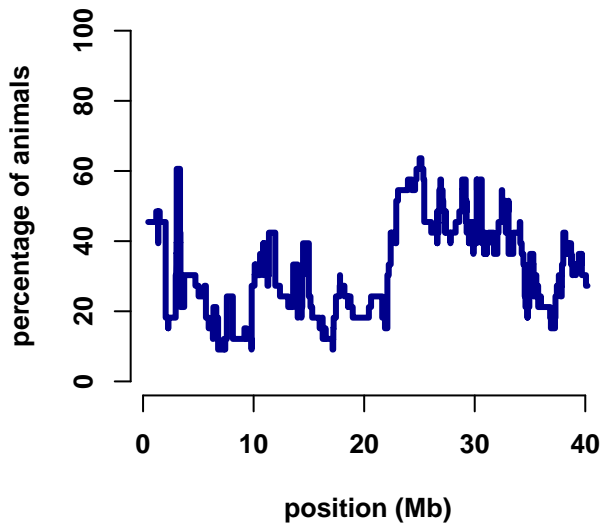



chromosome 33

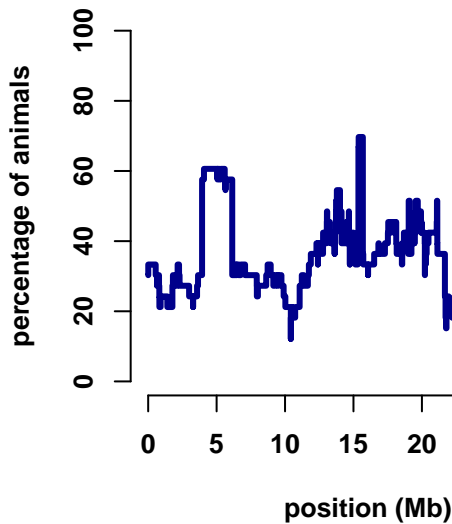

chromosome 34

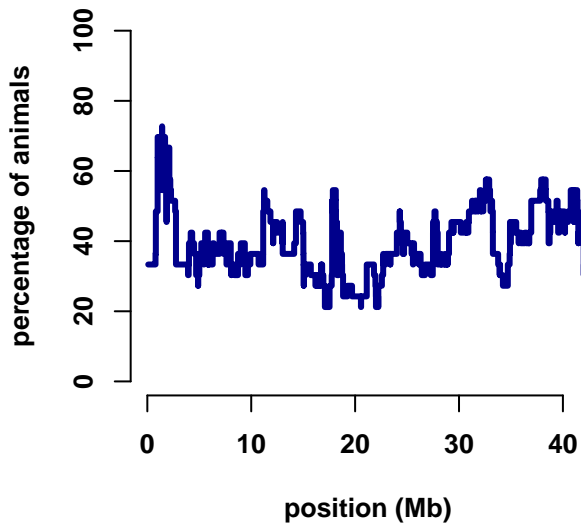

chromosome 35

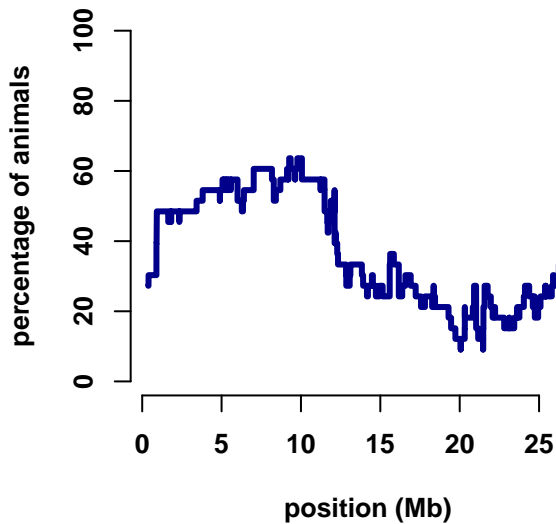

chromosome 36

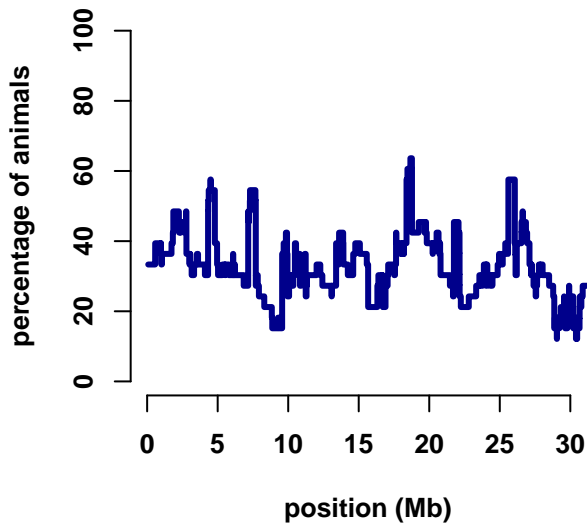

chromosome 37

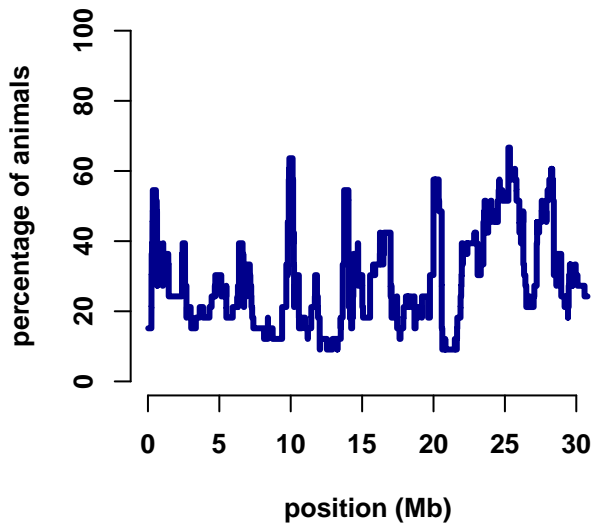

chromosome 38

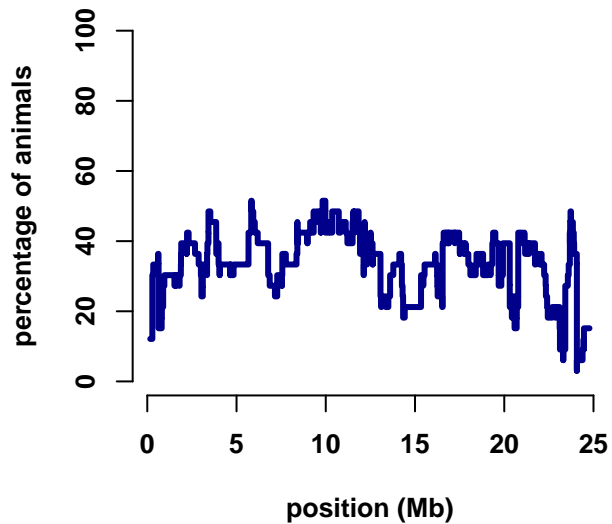

Supplement: s1 [file s1]
